# Supplementary material for: Carvedilol improves glucose tolerance and insulin sensitivity in treatment of adrenergic overdrive in high fat diet-induced obesity in mice
Source: PubMed Central journal article supplement (PMC6827914; doi:10.1371/journal.pone.0224674), 2019-11-04

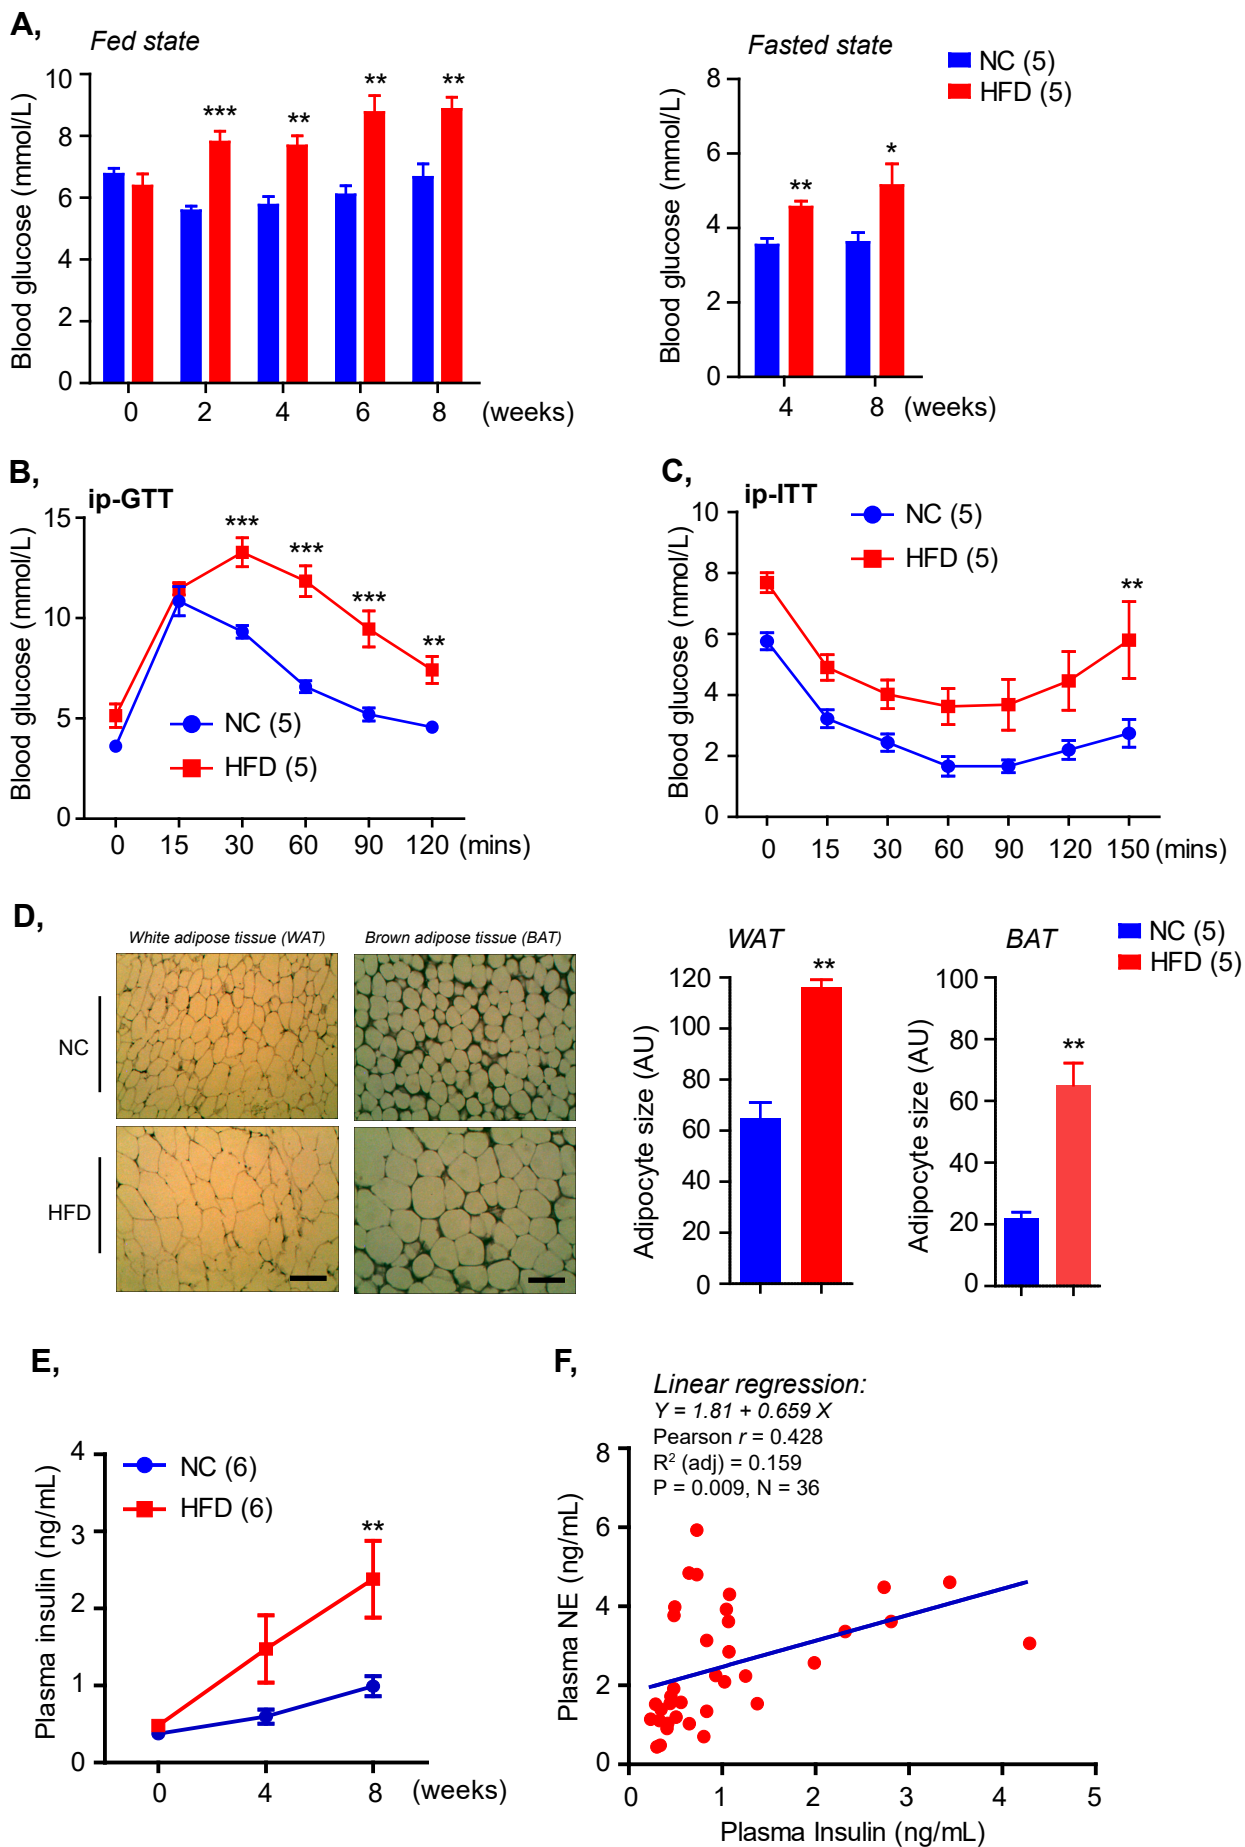

Supplement: pone.0224674.s001.pdf [file pone.0224674.s001.pdf]
